# Supplementary material
Source: HighWire-hosted journal article supplement (https://bmjopen.bmj.com/content/7/11/e018853)
Supplement: inline-supplementary-material-1 [file inline-supplementary-material-1.pdf]

**eTable 1**

Demographic data of participating students (n = 327)

| <b>Variables</b>   | <b>Frequency (%)</b> |
|--------------------|----------------------|
| <b>Age (years)</b> |                      |
| 17 – 20            | 174 (53)             |
| 21 – 25            | 153 (47)             |
| <b>Grade</b>       |                      |
| Fifth              | 50 (15)              |
| Fourth             | 86 (26)              |
| Third              | 94 (29)              |
| Second             | 62 (19)              |
| First              | 35 (11)              |
| <b>Gender</b>      |                      |
| Male               | 156 (48)             |
| Female             | 171 (52)             |
