# Supplementary material
Source: HighWire-hosted journal article supplement (https://bmjopen.bmj.com/content/7/11/e018853)
Supplement: inline-supplementary-material-2 [file inline-supplementary-material-2.pdf]

**eTable 2**

Demographic data of participating physicians (n = 165)

| <b>Variables</b>                   | <b>Frequency (%)</b> |
|------------------------------------|----------------------|
| <b>Age (years)</b>                 |                      |
| 26 – 39                            | 51 (31)              |
| 40 – 59                            | 84 (51)              |
| ≥ 60                               | 30 (18)              |
| Range = 26 - 81                    |                      |
| <b>Designation</b>                 |                      |
| Professor                          | 37 (22)              |
| Associate Professor                | 82 (50)              |
| Assistant Professor                | 46 (28)              |
| <b>Gender</b>                      |                      |
| Male                               | 93 (56)              |
| Female                             | 72 (44)              |
| <b>Teaching experience (years)</b> |                      |
| 1 – 9                              | 45 (27)              |
| 10 – 19                            | 57 (35)              |
| ≥ 20                               | 63 (38)              |
| Range = 1 – 35                     |                      |
